# Supplementary material
Source: MDPI journal article supplement (https://www.mdpi.com/1424-8247/16/11/1629)
Supplement: s1 [file s1]

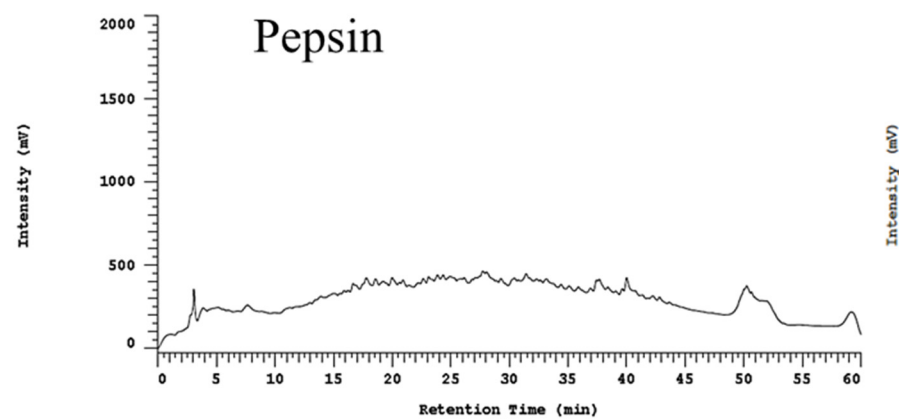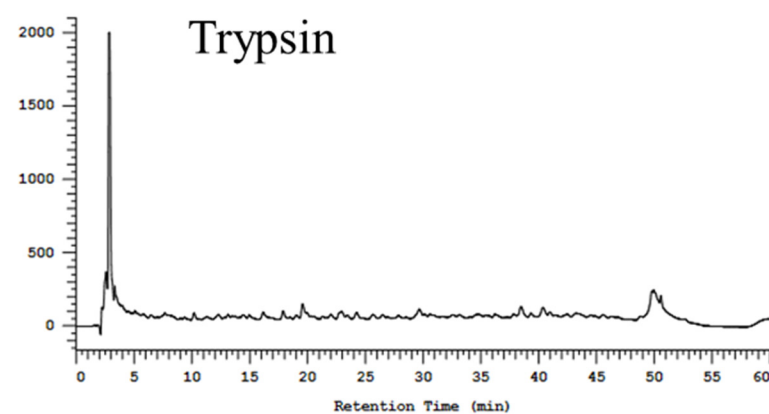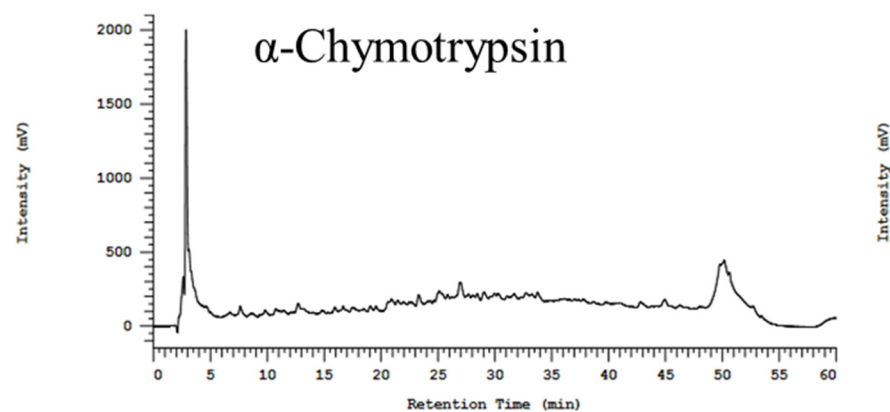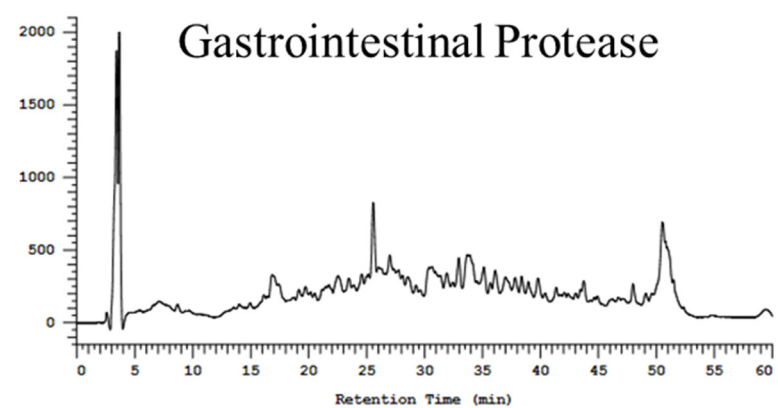

**Figure S1.** RP-HPLC chromatogram of 50  $\mu\text{g}/\mu\text{L}$  BGSP hydrolysate generated from pepsin, trypsin,  $\alpha$ -chymotrypsin, and gastrointestinal protease

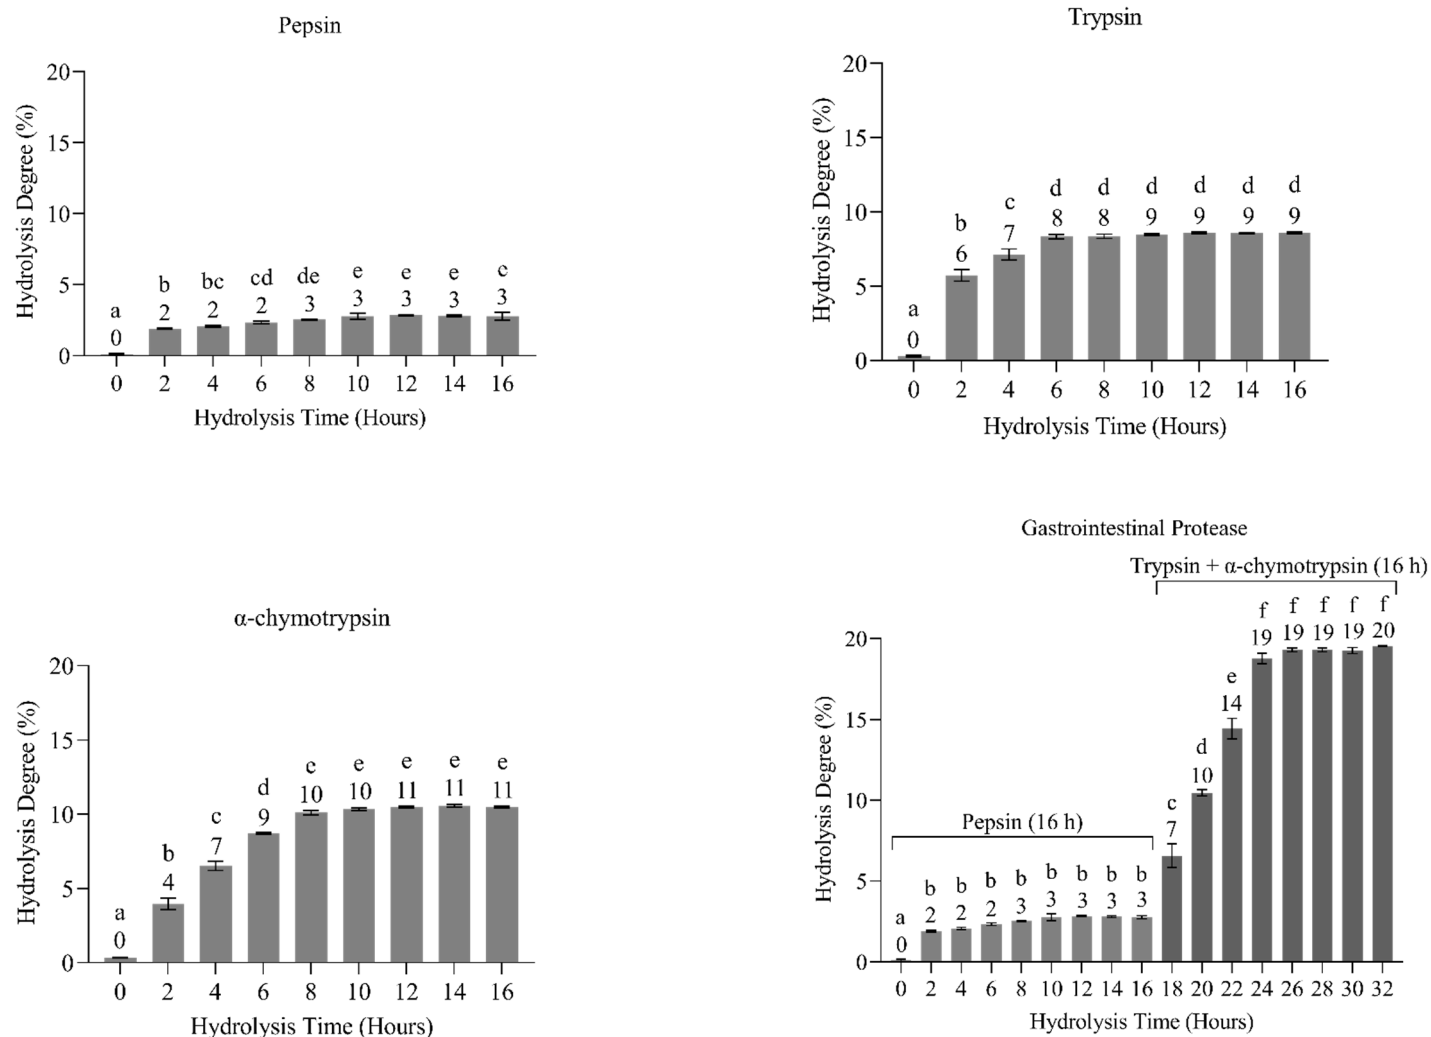

**Figure S2.** Hydrolysis Degree of BGSP hydrolysate generated from pepsin, trypsin,  $\alpha$ -chymotrypsin, and gastrointestinal protease. Different letters mean significantly different ( $p < 0.05$ ) of liberated amino acids at certain hydrolysis times compared to the control (0 hours).

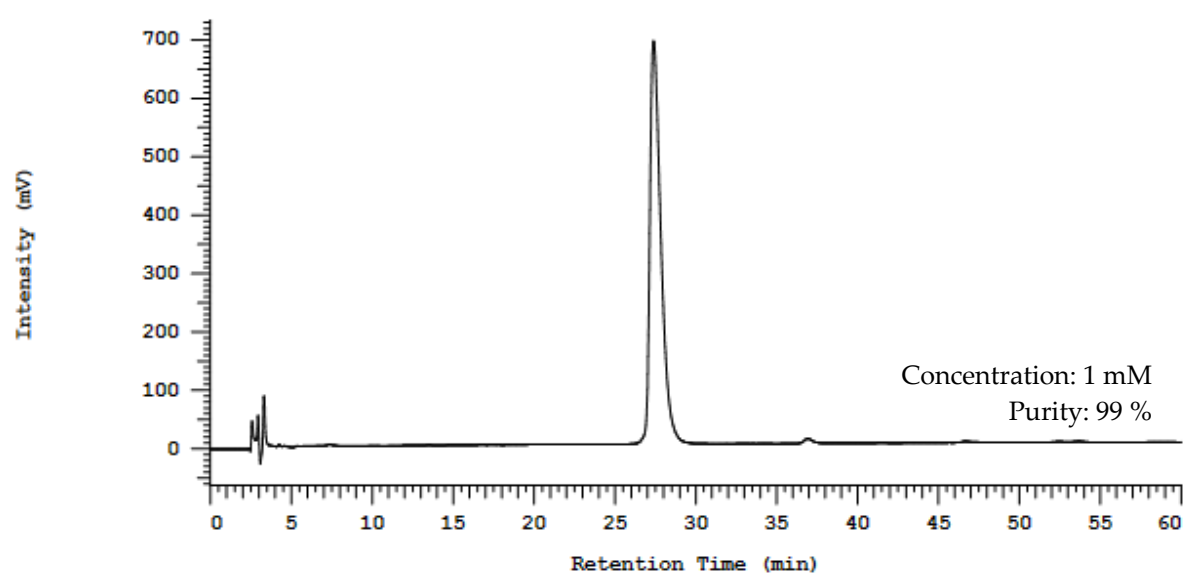

**Figure S3.** RP-HPLC chromatogram of synthetic AW6

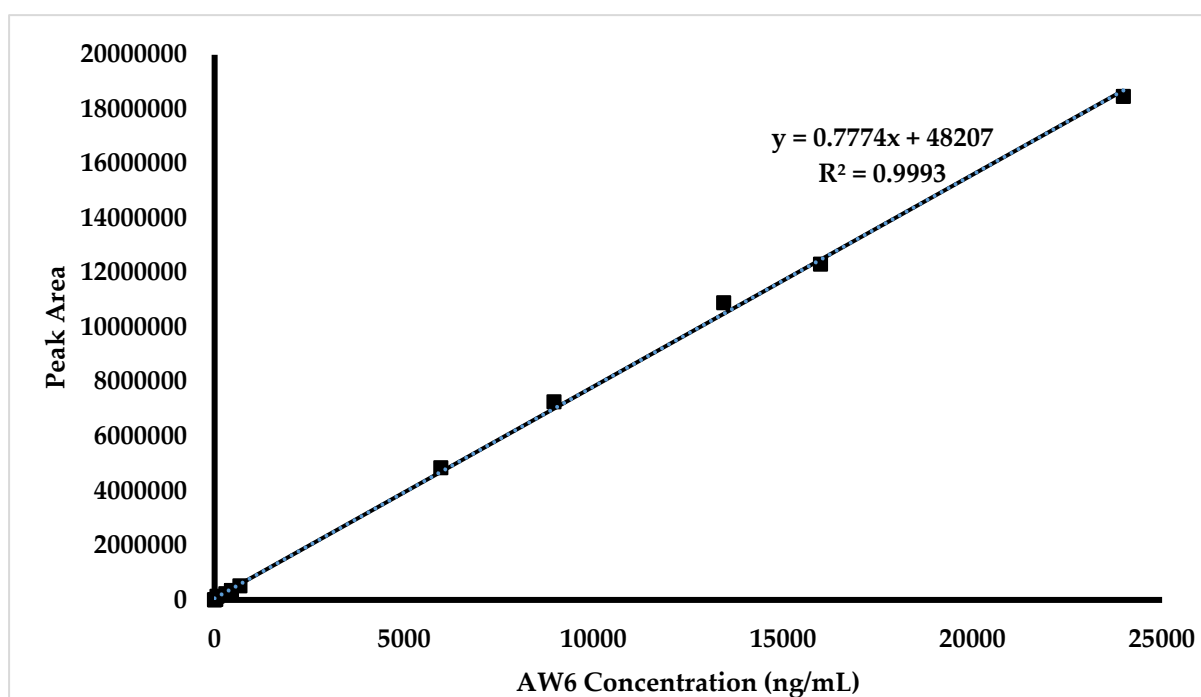

**Figure S4.** The standard calibration curve of AW6

**Table S1.** Identified peptides from GP BGSP hydrolysate fraction F5 from RP-HPLC fractionation

| Identified Protein                                                                       | Peptide Sequence | m/z<br>(Observed) | Mass      | Peptide<br>Length |
|------------------------------------------------------------------------------------------|------------------|-------------------|-----------|-------------------|
| (gi 157829880) chain A,<br>alpha-momocharin<br>(sequence coverage<br>28%)                | PALDSAISTL       | 494.2716          | 986.5284  | 10                |
|                                                                                          | DEVPSLATI        | 944.4933          | 943.4862  | 9                 |
|                                                                                          | ATISLENSW        | 1020.5003         | 1019.4924 | 9                 |
|                                                                                          | TISLENSW         | 949.4633          | 948.4553  | 8                 |
|                                                                                          | VVTSNIQLL        | 493.7979          | 985.5808  | 9                 |
|                                                                                          | IQLAQGNNGIF      | 587.8142          | 1173.6143 | 11                |
|                                                                                          | EKIPIGL          | 385.2444          | 768.4745  | 7                 |
|                                                                                          | IPIGL            | 512.3445          | 511.3370  | 5                 |
|                                                                                          | DSAISTLL         | 819.4460          | 818.4385  | 8                 |
|                                                                                          | ISLENSW          | 848.4136          | 847.4076  | 7                 |
|                                                                                          | ITLPY            | 606.3495          | 605.3425  | 5                 |
| (gi 1229803397)<br>legumin A-like<br>[Momordica charantia]<br>(sequence coverage<br>18%) | VYNIPL           | 718.4134          | 717.4061  | 6                 |
|                                                                                          | AAAGAL           | 473.2718          | 472.2645  | 6                 |
|                                                                                          | IQVVDDRGQTIF     | 695.8691          | 1389.7252 | 12                |
|                                                                                          | NIKVEGPL         | 982.5919          | 981.5858  | 9                 |
|                                                                                          | YIIEPNGL         | 918.4926          | 917.4858  | 8                 |
|                                                                                          | AAEEGLEW         | 904.4037          | 903.3974  | 8                 |
|                                                                                          | IIEPNGLL         | 868.5144          | 867.5065  | 8                 |
|                                                                                          | ALPVQVI          | 739.4713          | 738.4639  | 7                 |
|                                                                                          | PAGATHW          | 739.3508          | 738.3449  | 7                 |
|                                                                                          | TLAQIL           | 658.4133          | 657.4061  | 6                 |
|                                                                                          | IHKVEGPL         | 434.7789          | 867.5429  | 8                 |
| (gi 1229809665)<br>superoxide dismutase<br>[Cu-Zn] [Momordica                            | EGLEW            | 633.2882          | 632.2806  | 5                 |
|                                                                                          | HSIIF            | 308.6762          | 615.3380  | 5                 |
|                                                                                          | GASDVVSGTIF      | 1052.5234         | 1051.5186 | 11                |
|                                                                                          | AVAVL            | 472.2747          | 471.3057  | 5                 |
|                                                                                          | DVVSGTIF         | 837.4351          | 836.4280  | 8                 |

charantia] (sequence  
coverage 11%)

|                                       |                       |           |           |    |
|---------------------------------------|-----------------------|-----------|-----------|----|
|                                       | VVVAGEF               | 720.3925  | 719.3854  | 7  |
|                                       | NVANQLDPYL            | 573.7944  | 1145.5718 | 10 |
|                                       | EPTTSDVVVAGEFDQGSGSMR | 1084.9948 | 2167.9690 | 21 |
|                                       | TLAQLL                | 658.4130  | 657.4061  | 6  |
|                                       | QLFPR                 | 330.6841  | 659.3755  | 5  |
|                                       | LFGSL                 | 536.3083  | 535.3006  | 5  |
|                                       | APLVSW                | 672.3657  | 671.3643  | 6  |
| * <i>de novo</i> sequencing<br>(only) | QGLVSW                | 689.3613  | 688.3544  | 6  |
|                                       | NLDLGL                | 644.3618  | 643.3541  | 6  |
|                                       | LVVEL                 | 572.3657  | 571.3581  | 5  |
|                                       | QGKK                  | 230.7098  | 459.2805  | 4  |
|                                       | LPLGL                 | 512.3439  | 511.3370  | 5  |
|                                       | APLLSDSF              | 849.4352  | 848.4279  | 8  |
|                                       | ALVNAF                | 634.3193  | 633.3486  | 6  |
|                                       | HSAGF                 | 518.2610  | 517.2285  | 5  |
|                                       | SPVWVY                | 375.6943  | 749.3748  | 6  |

\**de novo* sequencing (only): PEAKS executed *de novo* peptide sequencing based on LC-MS/MS raw data without being assigned to the protein database matching

**Table S2.** Identified peptides from GP BGSP hydrolysate fraction S1 from SCX fractionation

| Identified Protein                                                                                                | Peptide Sequence      | m/z<br>(Observed) | Mass      | Peptide<br>Length |
|-------------------------------------------------------------------------------------------------------------------|-----------------------|-------------------|-----------|-------------------|
| (gi 157829880) chain A,<br>alpha-momocharin<br>(sequence coverage 6%)                                             | ATISLENSW             | 1020.4997         | 1019.4924 | 9                 |
|                                                                                                                   | TPIVL                 | 542.3547          | 541.3475  | 5                 |
| (gi 1229803397) legumin<br>A-like [Momordica<br>charantia] (sequence<br>coverage 4%)                              | ALPVQVIASAY           | 566.3237          | 1130.6335 | 11                |
|                                                                                                                   | FAVPAGATHW            | 528.7667          | 1055.5188 | 10                |
| (gi 1229803542) 11S<br>globulin seed storage<br>protein 2-like [Momordica<br>charantia] (sequence<br>coverage 5%) | IVVAF                 | 548.3444          | 547.3370  | 5                 |
|                                                                                                                   | IVAVSAGTVEW           | 1131.6045         | 1130.5972 | 11                |
|                                                                                                                   | VIPQFY                | 766.4132          | 765.4061  | 6                 |
| (gi 1229778196) aspartic<br>proteinase-like<br>[Momordica charantia]<br>(sequence coverage 3%)                    | ILGDIF                | 677.3859          | 676.3795  | 6                 |
|                                                                                                                   | VVVAGEF               | 720.3921          | 719.3854  | 7                 |
| *de novo sequencing<br>(only)                                                                                     | WLVPSVY               | 862.9591          | 862.4589  | 7                 |
|                                                                                                                   | NVANQLDPYL            | 573.7931          | 1145.5718 | 10                |
|                                                                                                                   | WELTL                 | 661.3743          | 660.3483  | 5                 |
|                                                                                                                   | LFLPPF                | 733.4279          | 732.4210  | 6                 |
|                                                                                                                   | EPTTSDVVVAGEFDQGSGSMR | 1084.9946         | 2167.9690 | 21                |
|                                                                                                                   | VFLPQF                | 750.4175          | 749.4112  | 6                 |
|                                                                                                                   | SLPDLVF               | 790.9355          | 789.4272  | 7                 |
|                                                                                                                   | NLPLLL                | 682.4500          | 681.4425  | 6                 |
|                                                                                                                   | APLVSW                | 672.3745          | 671.3663  | 6                 |

\**de novo* sequencing (only): PEAKS executed *de novo* peptide sequencing based on LC-MS/MS raw data without being assigned to the protein database matching

**Table S3.** The comparison of molecular interaction between lisinopril and AW6 on ACE (PDB code = 1O86)

| ACE Catalytic Site |                     | Lisinopril  |              | APLVSW                                                     |              |
|--------------------|---------------------|-------------|--------------|------------------------------------------------------------|--------------|
| Pocket             | Amino Acid Residues | Interaction | Distance (Å) | Interaction                                                | Distance (Å) |
| S1                 | Ala354              | H-Bond      | 2.9          | -                                                          | -            |
|                    | Glu384              | H-Bond      | 2.7          | -                                                          | -            |
|                    | Tyr523              | H-Bond      | 2.8          | H-Bond (Ser5 side chain)                                   | 1.9          |
| S1'                | Glu162              | H-Bond      | 3.4          | -                                                          | -            |
| S2'                | Gln281              | H-Bond      | 2.2          | -                                                          | -            |
|                    | His353              | H-Bond      | 2.8          | H-Bond (Trp6 main chain)                                   | 2.3          |
|                    | Lys511              | H-Bond      | 2.9          | Ionic (Trp6 main chain)<br>$\pi$ - $\pi$ (Trp6 side chain) | 3.3<br>6.8   |
|                    | His513              | H-Bond      | 3.1          | H-Bond (Ser5 side chain)                                   | 2.2          |
|                    | Tyr520              | H-Bond      | 2.6          | H-Bond (Trp6 main chain)                                   | 2.3          |
| Non-Catalytic Site | Glu143              | -           | -            | H-Bond (Ala1 main chain)                                   | 2.4          |
|                    |                     |             |              | H-Bond (Ala1 main chain)                                   | 2.3          |
|                    |                     |             |              | Ionic (Ala1 main chain)                                    | 2.8          |
|                    | Asn70               | -           | -            | H-Bond (Ala1 main chain)                                   | 2.5          |



**Table S4.** The comparison of molecular interaction between diprotin A and AW6 toward DPP4 (PDB code = 1WCY)

| DPP4 Catalytic Site |                     | Diprotin A  |                            | APLVSW (AW6)     |              |
|---------------------|---------------------|-------------|----------------------------|------------------|--------------|
| Pocket              | Amino Acid Residues | Interaction | Distance (Å)<br>Molecule B | Interaction      | Distance (Å) |
| S2                  | Glu205              | H-Bond      | 2.73                       | -                | -            |
|                     | Glu206              | H-Bond      | 2.65                       | -                | -            |
|                     | Tyr662              | H-Bond      | 3.00                       | -                | -            |
| S1                  | Tyr547              | H-Bond      | 2.68                       | -                | -            |
|                     | Tyr631              | H-Bond      | 2.98                       | -                | -            |
| S1'                 | Arg125              | H-Bond      | 2.99                       | -                | -            |
| Non-catalytic Site  | Ser59               | -           | -                          | H-Bond           | 2.00         |
|                     | Ile407              | -           | -                          | H-Bond           | 1.80         |
|                     | Arg471              | -           | -                          | H-Bond<br>Charge | 1.90<br>2.50 |
|                     | Glu408              | -           | -                          | H-Bond<br>Charge | 1.80<br>2.80 |
